# Supplementary material for: Antimicrobial PDMS Surfaces Prepared through Fast and Oxygen-Tolerant SI-SARA-ATRP, Using Na2SO3 as a Reducing Agent
Source: PubMed Central journal article supplement — ACS Omega. 2021 May 21;6(22):14551–8. doi: 10.1021/acsomega.1c01611 (PMC8190881; doi:10.1021/acsomega.1c01611), 2021-05-21
Supplement: ao1c01611_si_001.pdf [file ao1c01611_si_001.pdf]

# Antimicrobial PDMS surfaces prepared through fast and oxygen-tolerant SI-SARA-ATRP, using $\text{Na}_2\text{SO}_3$ as a reducing agent

*Christian Andersen<sup>1</sup>, Libor Zverina<sup>1</sup>, Koosha Ehtiati<sup>2</sup>, Esben Thormann<sup>2</sup>, Hanne Mordhorst<sup>3</sup>, Sünje J. Pamp<sup>3</sup>, Niels J. Madsen<sup>4</sup>, and Anders E. Daugaard<sup>1\*</sup>*

<sup>1</sup> Danish Polymer Centre, Department of Chemical and Biochemical Engineering, Technical University of Denmark, Søtofts Plads Building 229, 2800 Kgs. Lyngby, Denmark

<sup>2</sup> Department of Chemistry, Technical University of Denmark, Kemitorvet Building 207, 2800 Kgs. Lyngby, Denmark

<sup>3</sup> National Food Institute, Technical University of Denmark, Kemitorvet, Building 202, 2800 Kgs. Lyngby, Denmark

<sup>4</sup> Coloplast A/S, Høltedam 1-3, 3050 Humlebæk, Denmark

\* Corresponding Author: A.E. Daugaard, [adt@kt.dtu.dk](mailto:adt@kt.dtu.dk)

SUPPORTING INFORMATION

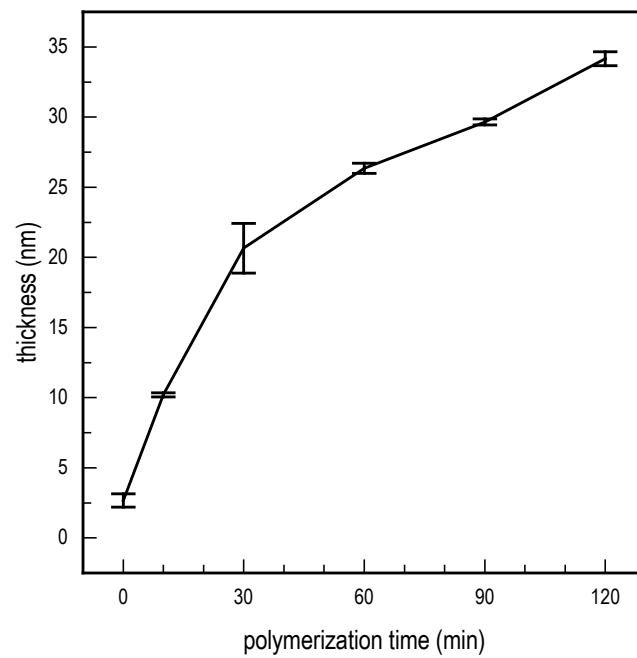

**Figure S1** Grafted PDMAEMA layer thickness over polymerization time. SI-ARGET-ATRP on silicon wafer using sodium ascorbate as reducing agent.

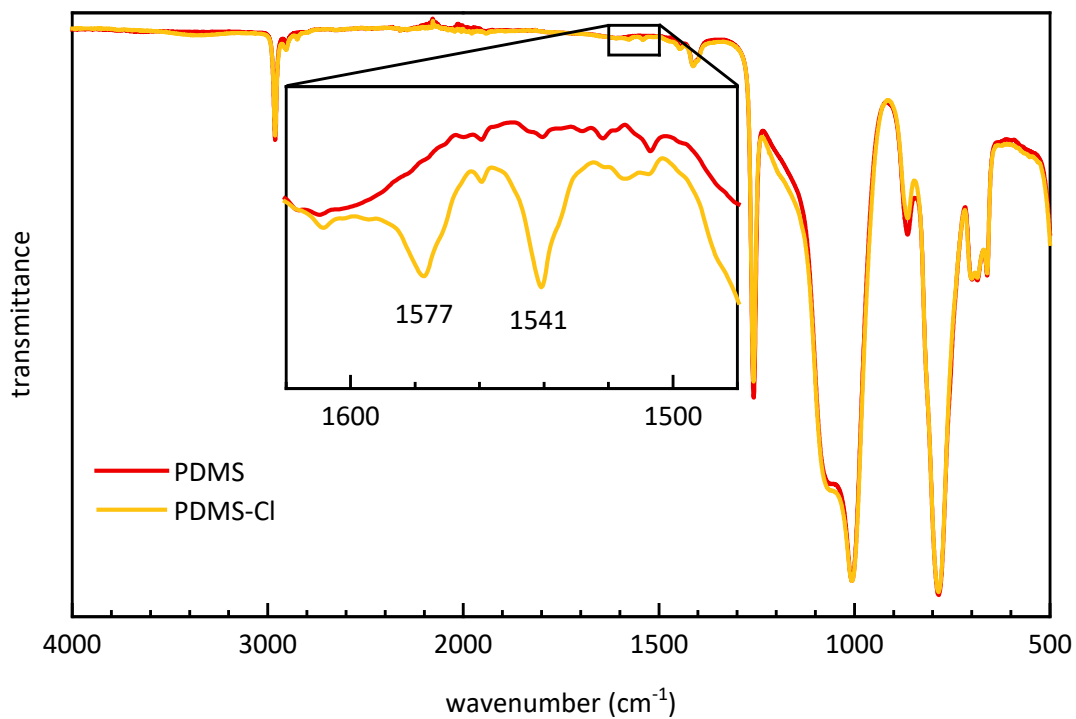

**Figure S2** FT-IR of pristine PDMS and PDMS-Cl with the ATRP initiator attached. The zoom in shows two conjugated carbon double bond stretches in PDMS-Cl originating from a benzene ring, confirming the presence of the ATRP initiator on the surface.

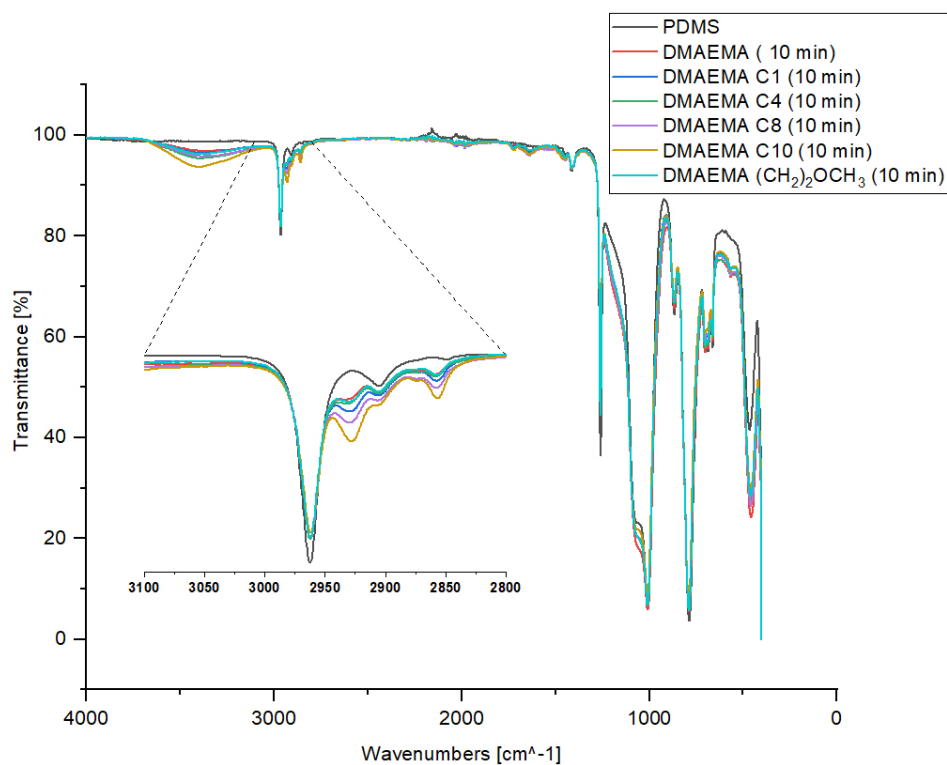

**Figure S3** FT-IR of surface functionalized PDMS after 10 min polymerization time of DMAEMA. The zoom in shows C-H stretches originating from the various alkyl halides.

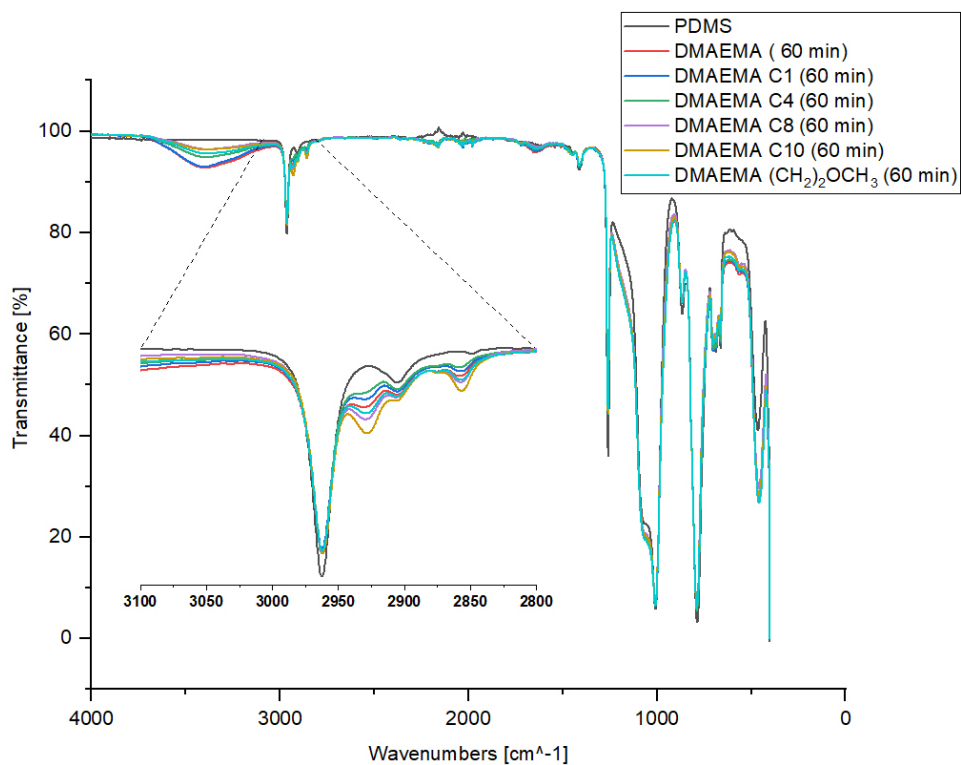

**Figure S4** FT-IR of surface functionalized PDMS after 60 min polymerization time of DMAEMA. The zoom in shows C-H stretches originating from the various alkyl halides.

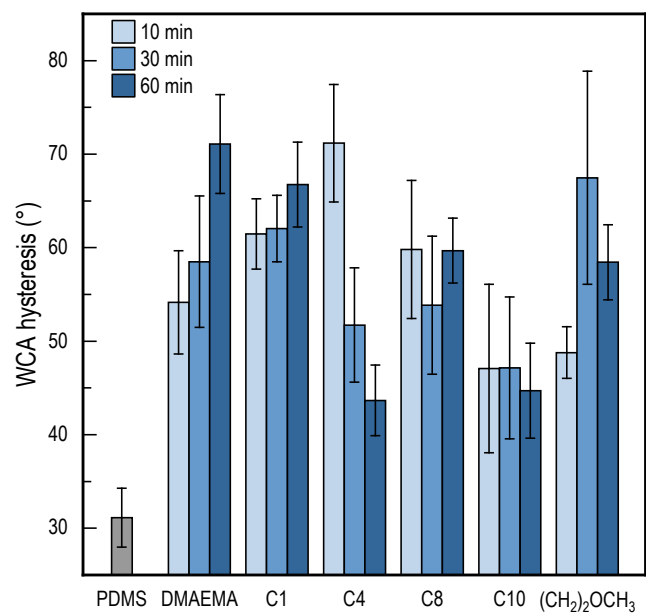

**Figure S5** WCA hysteresis of surface functionalized PDMS.
